# Supplementary material
Source: publisher figshare collection journal article supplement (https://acs.figshare.com/ndownloader/files/4188577)

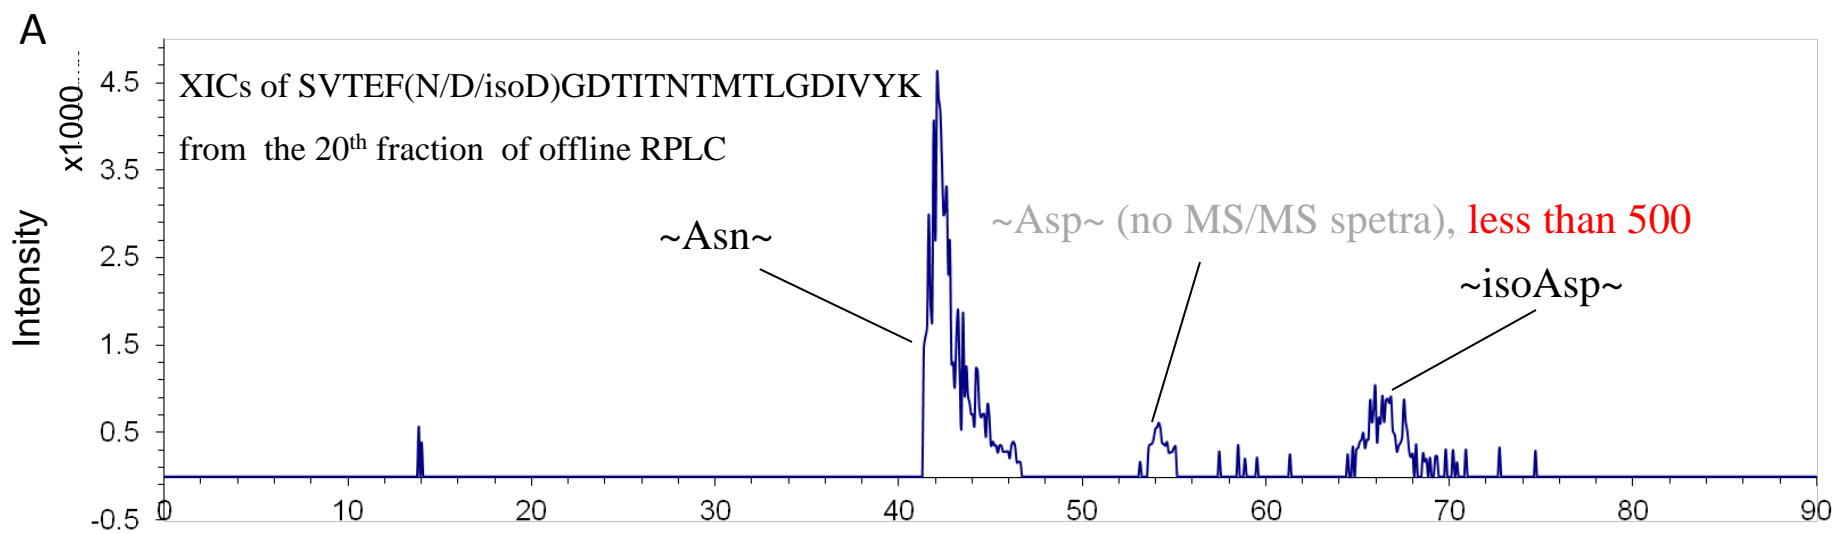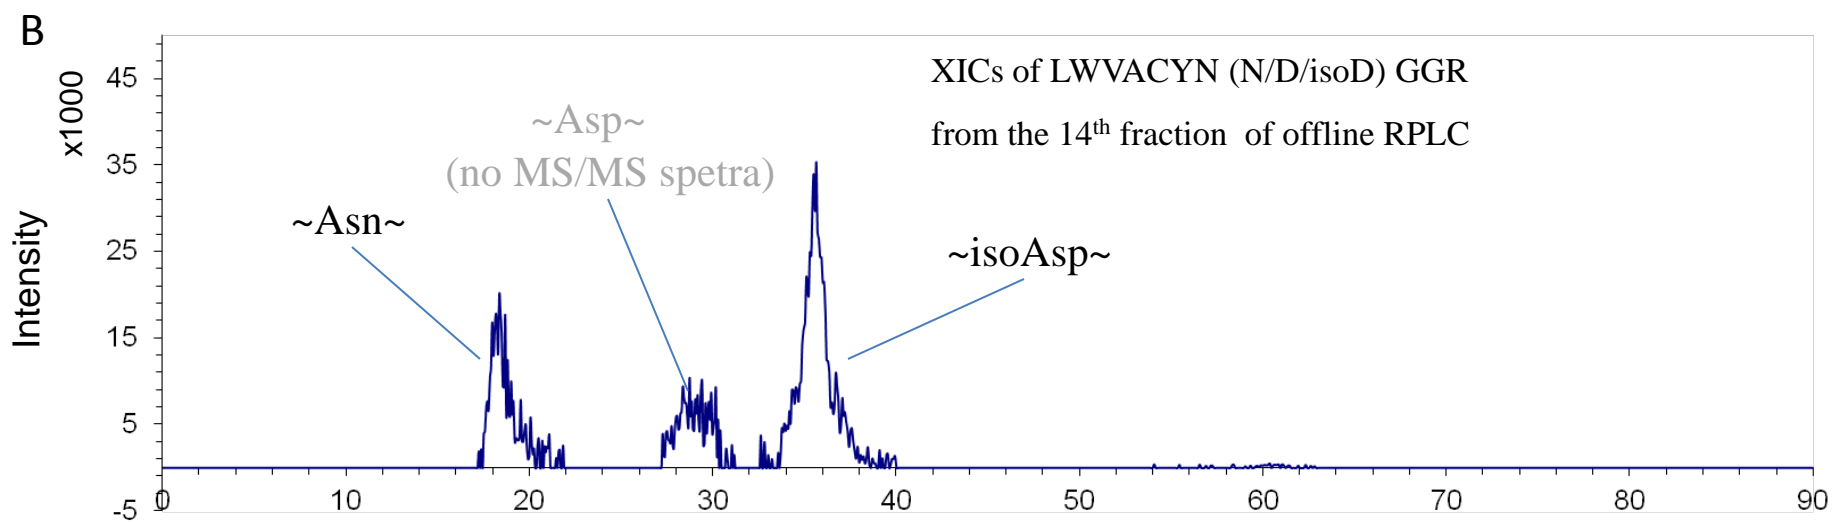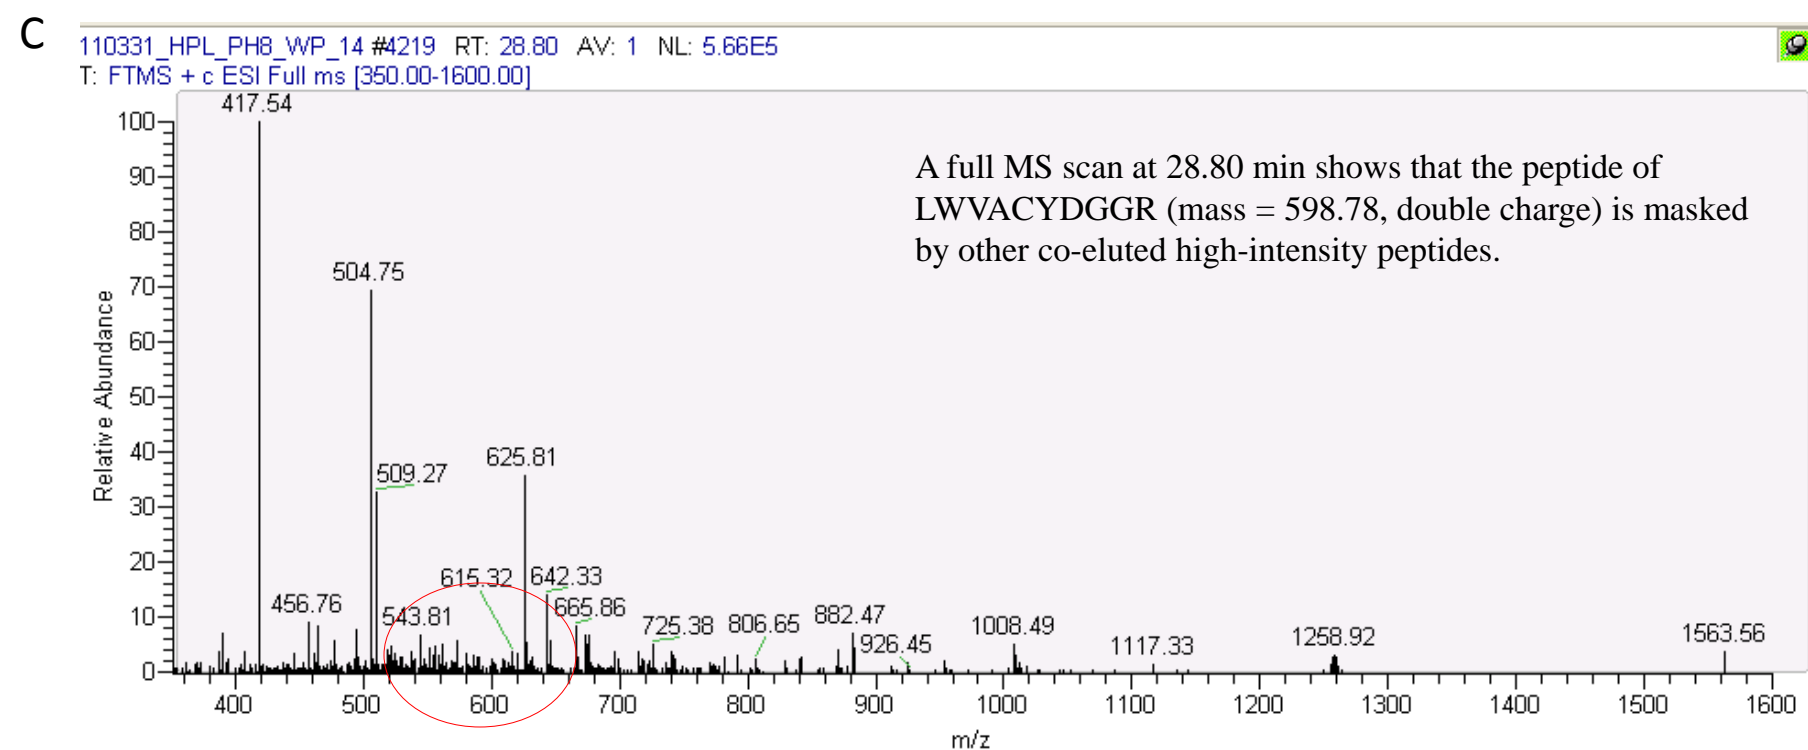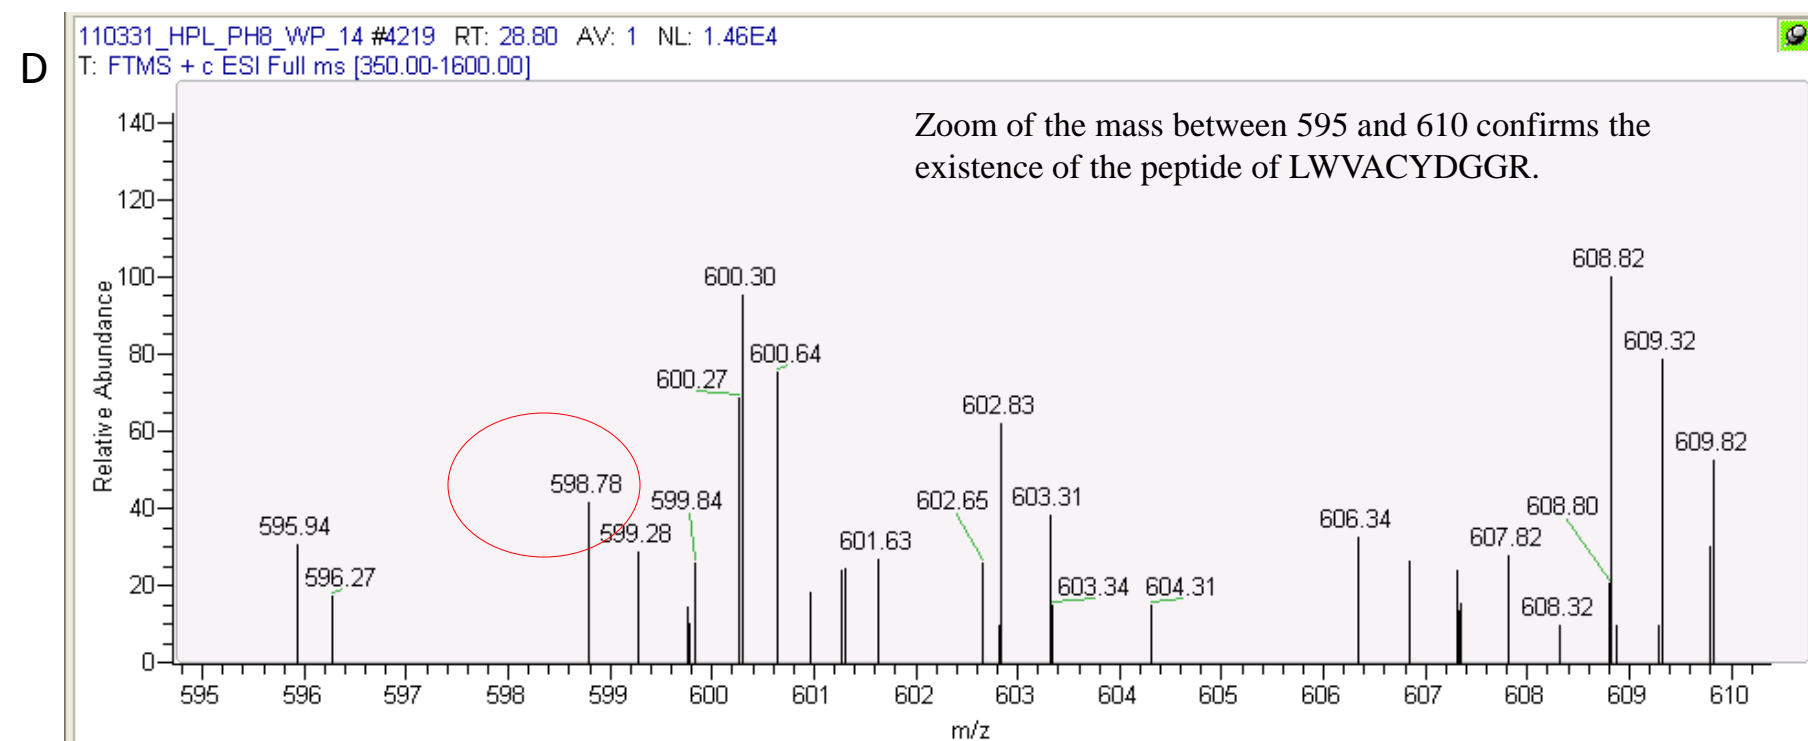

Supplement: Supplementary file 1 [file 4188577]
